# Supplementary material for: An emission-tunable fluorescent organic molecule for specific cellular imaging
Source: Royal Society of Chemistry journal article supplement (doi:10.1039/c6ra13965e), 2016-01-01
Supplement: c6ra13965e1.pdf [file c6ra13965e1.pdf]

## Electronic Supplementary Information

### **Emission-Tunable Fluorescent Organic Molecule for Specific Cellular Imaging**

Fu Tang,<sup>‡</sup> Xiaoyu Wang,<sup>‡</sup> Chuang Yao, Shuai Chen and Lidong Li\*

State Key Laboratory for Advanced Metals and Materials, School of Materials Science  
and Engineering, University of Science and Technology Beijing, Beijing 100083, P. R.  
China.

<sup>‡</sup> These authors contributed equally.

E-Mail: lidong@mater.ustb.edu.cn (L.L.).

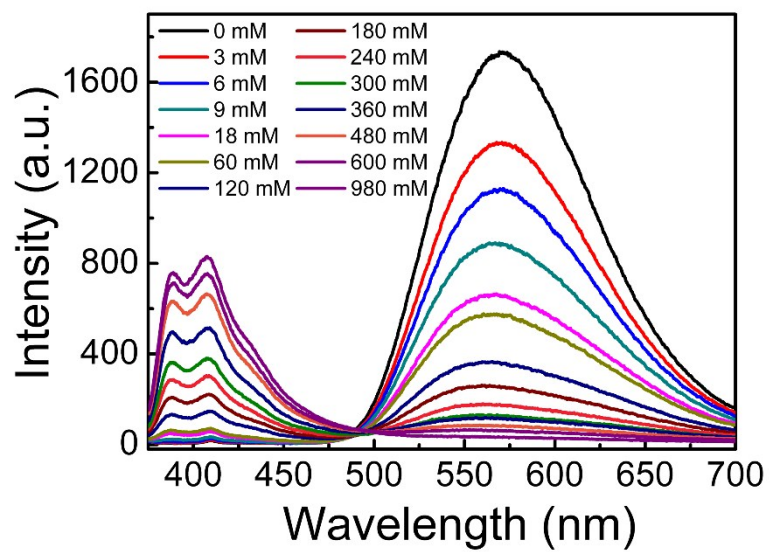

**Fig. S1** Emission spectra of PPBEN with different TFA concentrations in DMSO. Concentrations of PPBEN were 10  $\mu$ M. Excitation wavelength: 365 nm.
